# Supplementary material for: Molecular Divergence upon EGFR-TKI Resistance Could Be Dependent on the Exon Location of the Original EGFR-Sensitizing Mutation
Source: MDPI journal article supplement (doi:10.3390/cancers14184446), 2022-09-13
Supplement: s1 [file s1]

**Supplementary Table S1.** Type of mutations detected by NGS. MAF and MAPD parameters.

| <b>Mutations</b>                             | <b>N=365</b>    |
|----------------------------------------------|-----------------|
| Mean per sample                              | 2.9 (1; 16)     |
| Mutation type, No. (%) with data             |                 |
| snp                                          | 264 (72.3)      |
| insdel                                       | 96 (26.3)       |
| cnv                                          | 5 (1.4)         |
| Functional classification, No. (%) with data |                 |
| CNV                                          | 5 (1.4)         |
| Frameshift deletion                          | 20 (5.5)        |
| Frameshift insertion                         | 15 (4.1)        |
| Missense                                     | 250 (68.5)      |
| Nonframeshift block substitution             | 4 (1.1)         |
| Nonframeshift deletion                       | 44 (12)         |
| Nonframeshift insertion                      | 3 (0.8)         |
| Nonsense                                     | 20 (5.5)        |
| unknown                                      | 4 (1.1)         |
| Location, No. (%) with data                  |                 |
| Exonic                                       | 356 (98.9)      |
| Splice site 3'                               | 2 (0.6)         |
| Splice site 5'                               | 1 (0.3)         |
| UTR 5'                                       | 1 (0.3)         |
| MAF, mean (min; max), %                      | 5.2 (0.1; 77.7) |
| MAPD, mean (min; max), %                     | 0.3 (0.1; 1.8)  |

MAF: Mutant allele frequency; MAPD: Median of the absolute values of all pairwise differences.

**Supplementary Table S2.** Number of patients with tumors harboring mutations in each gene covered by the NGS panel.

| <b>Gene</b>   | <b>N patients</b> | <b>Frequency (%)</b> |
|---------------|-------------------|----------------------|
| <i>EGFR</i>   | 89                | 71,8                 |
| <i>TP53</i>   | 71                | 57,3                 |
| <i>APC</i>    | 14                | 11,3                 |
| <i>FGFR3</i>  | 9                 | 7,3                  |
| <i>FBXW7</i>  | 7                 | 5,6                  |
| <i>KRAS</i>   | 7                 | 5,6                  |
| <i>ERBB2</i>  | 6                 | 4,8                  |
| <i>MAP2K1</i> | 6                 | 4,8                  |
| <i>PDGFRA</i> | 6                 | 4,8                  |
| <i>PIK3CA</i> | 6                 | 4,8                  |
| <i>RET</i>    | 6                 | 4,8                  |
| <i>MET</i>    | 5                 | 4,0                  |
| <i>SMAD4</i>  | 5                 | 4,0                  |
| <i>BRAF</i>   | 4                 | 3,2                  |
| <i>ESR1</i>   | 4                 | 3,2                  |
| <i>MTOR</i>   | 4                 | 3,2                  |
| <i>NRAS</i>   | 4                 | 3,2                  |
| <i>SF3B1</i>  | 4                 | 3,2                  |
| <i>ALK</i>    | 3                 | 2,4                  |
| <i>CTNNB1</i> | 3                 | 2,4                  |
| <i>IDH2</i>   | 3                 | 2,4                  |
| <i>KIT</i>    | 3                 | 2,4                  |

|              |   |     |
|--------------|---|-----|
| <i>SMO</i>   | 3 | 2,4 |
| <i>FGFR2</i> | 2 | 1,6 |
| <i>GNAQ</i>  | 2 | 1,6 |
| <i>HRAS</i>  | 2 | 1,6 |
| <i>AKT1</i>  | 1 | 0,8 |
| <i>AR</i>    | 1 | 0,8 |
| <i>ERBB3</i> | 1 | 0,8 |
| <i>GNAS</i>  | 1 | 0,8 |
| <i>IDH1</i>  | 1 | 0,8 |
| <i>PTEN</i>  | 1 | 0,8 |

**Supplementary Table S3.** Relevant information regarding *NRAS* mutated patients.

|                                                     | <b>1300039</b>    | <b>13-003</b>    | <b>13-027</b>                     | <b>36-005</b>       |
|-----------------------------------------------------|-------------------|------------------|-----------------------------------|---------------------|
| <b>NRAS mutation by NGS (coding/protein)</b>        | c.175G>C / p.A59P | c.37G>A / p.G13S | c.35G>A / p.G12D                  | c.181C>A / p.Q61K   |
| <b>MAF NRAS mutation (%)</b>                        | 1.89              | 0.24             | 0.53                              | 1.80                |
| <b>EGFR mutation by NGS (coding/protein)</b>        | Non detected      | Non detected     | c.2235_2249del15 / p.E746_A750del | c.2573T>G / p.L858R |
| <b>MAF EGFR mutation (%)</b>                        | -                 | -                | 1.98                              | 25.63               |
| <b>p.T790M by NGS</b>                               | Non detected      | Non detected     | Non detected                      | Non detected        |
| <b>EGFR mutation in tumor at stage IV diagnosis</b> | p.G719X           | p.L861Q          | p.E746_A750del                    | p.L858R             |
| <b>Sex</b>                                          | Male              | Female           | Female                            | Female              |
| <b>Age (years)</b>                                  | 58                | 64               | 89                                | 52                  |
| <b>Smoking</b>                                      | Smoker            | Former smoker    | Never smoker                      | Never smoker        |
| <b>Histology</b>                                    | Adenocarcinoma    | Adenocarcinoma   | Adenocarcinoma                    | Adenocarcinoma      |
| <b>ECOG-PS</b>                                      | NA                | 0                | 1                                 | 1                   |
| <b>Metastases location at stage IV diagnosis</b>    | Thoracic          | Thoracic         | Thoracic                          | CNS                 |
| <b>Stage</b>                                        | IVA               | IVA              | IVA                               | IVB                 |
| <b>First-line TKI</b>                               | Afatinib          | Gefitinib        | Erlotinib                         | Afatinib            |
| <b>PFS (months)</b>                                 | 16                | 9.7              | 6.6                               | 7.6                 |
| <b>Progression sites</b>                            | NA                | Thoracic         | Thoracic                          | NA                  |
| <b>Second-line treatment</b>                        | Osimertinib       | Chemotherapy     | None                              | Osimertinib         |
| <b>Exitus</b>                                       | NA                | 0                | 1                                 | 1                   |
| <b>OS (months)</b>                                  | NA                | 62.3             | 11.8                              | 9.7                 |

CNS: Central Nervous System; ECOG-PS: Eastern Cooperative Oncology Group Performance Status; MAF: Mutant Allele Frequency; NA: Not Available; NGS: Next-Generation Sequencing; OS: Overall survival; PFS: Progression-Free Survival.

**Supplementary Table S4.** Relevant information regarding *HRAS* mutated patients.

|                                                     | <b>400003</b>    | <b>15-003</b>                     |
|-----------------------------------------------------|------------------|-----------------------------------|
| <b>HRAS mutation by NGS (coding/protein)</b>        | c.37G>C / p.G13R | c.183G>T / p.Q61H                 |
| <b>MAF HRAS mutation (%)</b>                        | 4.07             | 0.40                              |
| <b>EGFR mutation by NGS (coding/protein)</b>        | Non detected     | c.2236_2250del15 / p.E746_A750del |
| <b>MAF EGFR mutation (%)</b>                        | -                | 13.80                             |
| <b>p.T790M by NGS</b>                               | Non detected     | Detected                          |
| <b>EGFR mutation in tumor at stage IV diagnosis</b> | p.G719X          | p.E746_A750del                    |

|                                           |                   |                |
|-------------------------------------------|-------------------|----------------|
| Sex                                       | Male              | Male           |
| Age (years)                               | 74                | 73             |
| Smoking                                   | Former smoker     | Never smoker   |
| Histology                                 | Adenocarcinoma    | Adenocarcinoma |
| ECOG-PS                                   | NA                | 1              |
| Metastases location at stage IV diagnosis | Thoracic and bone | Bone           |
| Stage                                     | IVB               | IVB            |
| First-line TKI                            | Afatinib          | Erlotinib      |
| PFS (months)                              | 5.8               | 17.1           |
| Progression sites                         | NA                | Bone           |
| Second-line treatment                     | None              | Osimertinib    |
| Exitus                                    | NA                | No             |
| OS (months)                               | NA                | 53.4           |

ECOG-PS: Eastern Cooperative Oncology Group Performance Status; MAF: Mutant Allele Frequency; NA: Not Available; NGS: Next-Generation Sequencing; OS: Overall survival; PFS: Progression-Free Survival.
