# Supplementary material for: Molecular Divergence upon EGFR-TKI Resistance Could Be Dependent on the Exon Location of the Original EGFR-Sensitizing Mutation
Source: Cancers (Basel). 2022 Sep 13;14(18):4446. doi: 10.3390/cancers14184446 (PMC9496947; doi:10.3390/cancers14184446)
Supplement: Supplementary file 1 [file cancers-14-04446-s001.zip]

Archive with 6 entries (6 files):
- Supplemental data S1.xlsx
- Supplemental data S2.xlsx
- Supplemental data S3.xlsx
- Supplemental data S4.xlsx
- Supplementary_Figures.pdf
- Supplementary_Tables.pdf
