# Supplementary material for: Molecular Divergence upon EGFR-TKI Resistance Could Be Dependent on the Exon Location of the Original EGFR-Sensitizing Mutation
Source: Cancers (Basel). 2022 Sep 13;14(18):4446. doi: 10.3390/cancers14184446 (PMC9496947; doi:10.3390/cancers14184446)
Supplement: Supplementary file 1 [file cancers-14-04446-s001.zip › Supplemental data S1.xlsx]

## Sheet: Oncomine Pan-Cancer cell-free
Hotspot Genes	Tumor Supressor Genes	Copy Number Genes	Gene Fusions
AKT1	APC	CCND1	ALK
ALK	FBXW7	CCND2	BRAF
AR	PTEN	CCND3	ERG
ARAF	TP53	CDK4	ETV1
BRAF		CDK6	FGFR1
CHEK2		EGFR	FGFR2
DDR2		ERBB2	FGFR3
EGFR		FGFR1	MET
ERBB2		FGFR2	NTRK1
ERBB3		FGFR3	NTRK3
ESR1		MET	RET
FGFR1		MYC	ROS1
FGFR2
FGFR3
FGFR4
FLT3
GNA11
GNAQ
GNAS
HRAS
IDH1
IDH2
KIT
KRAS
MAP2K1
MAP2K2
MET
MTOR
NRAS
NTRK1
NTRK3
PDGFRA
PIK3CA
RAF1
RET
ROS1
SF3B1
SMAD4
SMO
