# Supplementary material for: Molecular Divergence upon EGFR-TKI Resistance Could Be Dependent on the Exon Location of the Original EGFR-Sensitizing Mutation
Source: Cancers (Basel). 2022 Sep 13;14(18):4446. doi: 10.3390/cancers14184446 (PMC9496947; doi:10.3390/cancers14184446)
Supplement: Supplementary file 1 [file cancers-14-04446-s001.zip › Supplemental data S2.xlsx]

## Sheet: dPCR_assays
Gene	coding_change	protein_change
ALK	c.3806G>C	p.G1269A
ALK	c.3824G>A	p.R1275Q
ALK	c.3604G>A	p.G1202R
ALK	c.3605G>A	p.G1202E
ALK	c.3599C>T	p.A1200V
ALK	c.3617C>A	P.S1206Y
ALK	c.3586C>A	p.L1196M
ALK	c.4405C>T	p.P1469S
BRAF	c.1397G>C	p.G466A
BRAF	c.1799T>A	p.V600E
BRAF	c.1397G>T	p.G466V
BRAF	c.1786G>T	p.G596C
EGFR	c.2369C>T	p.T790M
EGFR	c.2235_2249del15	p.E746_A750delELREA
EGFR	c.2236_2250del15	p.E746_A750delELREA
EGFR	c.2239_2253del15	p.L747_T751delLREAT
EGFR	c.2239_2256del18	p.L747_S752delLREATS
EGFR	c.2239_2248TTAAGAGAAG>C	p.L747_A750>P
EGFR	c.2239_2251>C	p.L747_T751>P
EGFR	c.2237_2255>T	p.E746_S752>V
EGFR	c.2238_2248>GC	p.L747_A750>P
EGFR	c.2236_2253del18	p.E746_T751delELREAT
EGFR	c.2240_2257del18	p.L747_P753>S
EGFR	c.2239_2258>CA	p.L747_P753>Q
EGFR	c.2237_2254del18	p.E746_S752>A
EGFR	c.2237_2251del15	p.E746_T751>A
EGFR	c.2235_2252>AAT	p.E746_T751>I
EGFR	c.2573T>G	p.L858R
EGFR	c.2573_2574TG>GT	p.L858R
EGFR	c.2582T>A	p.L861Q
EGFR	c.2310_2311insGGT	p.D770_N771insG
EGFR	c.2319_2320insCAC	p.H773_V774insH
EGFR	C797S CG	p.C797S
EGFR	c.2156G>C	p.G719A
EGFR	c.2155G>A	p.G719S
EGFR	c.2155G>T	p.G719C
EGFR	c.2303G>T	p.S768I
EGFR	c.2543C>T	p.P848L
EGFR	c.2248 G>C	p.A750P
EGFR	c.2299 G>A	p.A767T
GNAQ	c.625C>A	p.Q209K
IDH1	c.395G>T	p.R132L
KRAS	c.38G>A	p.G13D
KRAS	c.37G>A	p.G13C
KRAS	c.35G>A	p.G12D
KRAS	c.35G>T	p.G12V
KRAS	c.34G>T	p.G12C
KRAS	c.35G>C	p.G12A
KRAS	c.436G>T	p.A146S
KRAS	c.183A>C	p.Q61H
KRAS	c.44G>T	p.G15V
KRAS	c.436G>A	p.A146T
KRAS	c.40G>A	p.V14I
KRAS	c.34G>A	p.G12S
KRAS	c.43G>T	p.G15C
MAP2K1	c.385T>C	p.F129L
MET	c.1685C>T	p.W992I
MET	13-15 (MET14exon skipping)	-
MYC	c.77A>G	p.N26S
NRAS	c.38G>A	p.G13D
NRAS	c.40G>A	p.V14I
NRAS	c.59C>T	p.T20I
PIK3CA	c.1624G>A	p.E542K
PIK3CA	c.1633G>A	p.E545K
PIK3CA	c.3140A>G	p.H1047R
PIK3CA	c.1634A>C	p.E545A
PIK3CA	c.1633G>C	p.E545Q
PIK3CA	c.1112T>C	p.V371A
RET	c.2687C>T	p.S896F
TP53	c.848G>C	p.R283P
TP53	c.733G>A	p.G245S
TP53	c.747G>T	p.R249S
TP53	c.818G>A	p.R273H
TP53	c.844C>T	p.R282W
TP53	c.818G>T	p.R273L
TP53	c.742C>T	p.R248W
TP53	c.733G>T	p.G245C
TP53	c.274C>G	p.P92A
TP53	c.524G>A	p.R175H
