# Supplementary material for: Molecular Divergence upon EGFR-TKI Resistance Could Be Dependent on the Exon Location of the Original EGFR-Sensitizing Mutation
Source: Cancers (Basel). 2022 Sep 13;14(18):4446. doi: 10.3390/cancers14184446 (PMC9496947; doi:10.3390/cancers14184446)
Supplement: Supplementary file 1 [file cancers-14-04446-s001.zip › Supplemental data S3.xlsx]

## Sheet: Validation.resistance.mut
Sample	Gene	Coding transcript change	Protein change	Transcript	Rowtype	MAF	Functional classification	Location	Oncomine gene class	Oncomine variant class	Variant clinical significance	MAPD	dPCR validation in progression sample	MAF dPCR	Detected in previous samples
300046	MAP2K1	c.371C>T	p.P124L	NM_002755.3	snp	1.566	missense	exonic	Gain-of-Function	Hotspot	Pathogenic/Likely_pathogenic	0.527	sample not available	-	sample not available
400003	HRAS	c.37G>C	p.G13R	NM_001130442.2	snp	4.0724	missense	exonic	Gain-of-Function	Hotspot	Pathogenic/Likely_pathogenic	0.201	sample not available	-	sample not available
400003	KRAS	c.35G>T	p.G12V	NM_033360.3	snp	4.14938	missense	exonic	Gain-of-Function	Hotspot		0.201	Confirmed	3.606	samples not available
1000040	KRAS	c.182A>G	p.Q61R	NM_033360.3	snp	0.18018	missense	exonic			Pathogenic	0.23	sample not available	-	samples not available
1300039	NRAS	c.175G>C	p.A59P	NM_002524.4	snp	1.88679	missense	exonic				0.93	sample not available	-	sample not available
7200063	PIK3CA	c.277C>T	p.R93W	NM_006218.3	snp	0.458716	missense	exonic				0.205	sample not available	-	sample not available
8500002	KRAS	c.34G>A	p.G12S	NM_033360.3	snp	0.616592	missense	exonic	Gain-of-Function	Hotspot		0.096	Confirmed	0.786	samples not available
03-002	BRAF	c.1780G>A	p.D594N	NM_004333.4	snp	0.130634	missense	exonic				0.263	sample not available	-	sample not available
03-002	MET	CNV	CNV		CNV		CNV		Gain-of-Function	Amplification		0.263	Confirmed	(NGS)	Yes
04-016	ERBB2	CNV	CNV		CNV		CNV		Gain-of-Function	Amplification		0.378	Confirmed	(NGS)	No
06-006	MAP2K1	c.170A>G	p.K57R	NM_002755.4	snp	0.133907	missense	exonic				0.391	sample not available	-	sample not available
08-010	PTEN	c.517C>T	p.R173C	NM_000314.6	snp	0.361664	missense	exonic	Loss-of-Function	Hotspot	Pathogenic/Likely_pathogenic	0.244	sample not available	-	sample not available
11-006	KRAS	c.34G>T	p.G12C	NM_033360.3	snp	18.1153	missense	exonic	Gain-of-Function	Hotspot		0.261	Confirmed	14.528	No
11-008	PIK3CA	c.1633G>A	p.E545K	NM_006218.3	snp	0.669643	missense	exonic	Gain-of-Function	Hotspot	Pathogenic/Likely_pathogenic	0.243	Confirmed	1.485	No
13-003	NRAS	c.37G>A	p.G13S	NM_002524.5	snp	0.23753	missense	exonic				0.189	sample not available	-	sample not available
13-014	BRAF	c.1799T>A	p.V600E	NM_004333.4	snp	1.60321	missense	exonic	Gain-of-Function	Hotspot		0.189	Confirmed	0.168	No
13-015	EGFR	CNV	CNV		CNV		CNV		Gain-of-Function	Amplification		0.334	Confirmed	(NGS)	No
13-027	NRAS	c.35G>A	p.G12D	NM_002524.5	snp	0.529101	missense	exonic	Gain-of-Function	Hotspot	Pathogenic	0.283	sample not available	-	sample not available
15-003	HRAS	c.183G>T	p.Q61H	NM_001130442.2	snp	0.402414	missense	exonic				0.185	sample not available	-	sample not available
15-012	EGFR	CNV	CNV		CNV		CNV		Gain-of-Function	Amplification		0.259	Confirmed	(NGS)	Yes
19-001	EGFR	CNV	CNV		CNV		CNV		Gain-of-Function	Amplification		0.294	Confirmed	(NGS)	No
26-004	KRAS	c.436G>A	p.A146T	NM_033360.3	snp	0.187	missense	exonic				0.392	Confirmed	0.401	Yes
33-001	KRAS	c.44G>T	p.G15V	NM_033360.4	snp	0.568182	missense	exonic				0.232	sample not available	-	No
36-005	KRAS	c.183A>C	p.Q61H	NM_033360.3	snp	3.67435	missense	exonic	Gain-of-Function	Hotspot	Pathogenic/Likely_pathogenic	0.429	sample not available	-	No
36-005	KRAS	c.35G>A	p.G12D	NM_033360.3	snp	0.639829	missense	exonic	Gain-of-Function	Hotspot		0.429	Confirmed	2.255	No
36-005	NRAS	c.181C>A	p.Q61K	NM_002524.4	snp	1.80485	missense	exonic	Gain-of-Function	Hotspot	Pathogenic/Likely_pathogenic	0.429	sample not available	-	sample not available
