# Supplementary material for: Molecular Divergence upon EGFR-TKI Resistance Could Be Dependent on the Exon Location of the Original EGFR-Sensitizing Mutation
Source: Cancers (Basel). 2022 Sep 13;14(18):4446. doi: 10.3390/cancers14184446 (PMC9496947; doi:10.3390/cancers14184446)
Supplement: Supplementary file 1 [file cancers-14-04446-s001.zip › Supplemental data S4.xlsx]

## Sheet: variants_datasheet
Sample	Gene	Coding transcript change	Protein change	Transcript	Rowtype	Chromosome	Position	MAF	Exon	Functional classification	Location	Oncomine gene class	Oncomine variant class	Variant clinical significance
300046	EGFR	c.2369C>T	p.T790M	NM_005228.4	snp	chr7	55249071	0.485437	20	missense	exonic
300046	MAP2K1	c.371C>T	p.P124L	NM_002755.3	snp	chr15	66729163	1.566	3	missense	exonic	Gain-of-Function	Hotspot	Pathogenic/Likely_pathogenic
400003	HRAS	c.37G>C	p.G13R	NM_001130442.2	snp	chr11	534286	4.0724	2	missense	exonic	Gain-of-Function	Hotspot	Pathogenic/Likely_pathogenic
400003	KRAS	c.35G>T	p.G12V	NM_033360.3	snp	chr12	25398283	4.14938	2	missense	exonic	Gain-of-Function	Hotspot
400003	TP53	c.535dupC	p.H179Pfs	NM_000546.5	ins	chr17	7578394	1.26582	5	frameshiftInsertion	exonic
400003	TP53	c.536_537insC	p.E180*	NM_000546.5	ins	chr17	7578393	6.60377	5	nonsense	exonic	Loss-of-Function	Deleterious
400007	EGFR	c.2236_2252delGAATTAAGAGAAGCAACinsAT	p.E746_T751delinsI	NM_005228.4	complex	chr7	55242465	23.0815	19	nonframeshiftBlockSubstitution	exonic	Gain-of-Function	Hotspot
400007	EGFR	c.2369C>T	p.T790M	NM_005228.4	snp	chr7	55249070	15.8088	20	missense	exonic	Gain-of-Function	Hotspot
400007	FBXW7	c.2065C>A	p.R689S	NM_033632.3	snp	chr4	153244092	0.154679	12	missense	exonic
400007	TP53	c.166G>T	p.E56*	NM_000546.5	snp	chr17	7579521	2.6835	4	nonsense	exonic	Loss-of-Function	Deleterious
400007	TP53	c.427G>A	p.V143M	NM_000546.5	snp	chr17	7578503	0.257898	5	missense	exonic			Conflicting_interpretations_of_pathogenicity
500048	EGFR	c.2240_2257delTAAGAGAAGCAACATCTC	p.L747_P753delinsS	NM_005228.4	del	chr7	55242462	33.3333	19	nonframeshiftDeletion	exonic	Gain-of-Function	Hotspot
500048	TP53	c.857A>C	p.E286A	NM_000546.5	snp	chr17	7577081	34.375	8	missense	exonic	Loss-of-Function	Hotspot	Likely_pathogenic
1000040	ALK	c.3598_3599delGCinsCG	p.A1200R	NM_004304.4	mnp	chr2	29443611	0.395704	23	nonframeshiftBlockSubstitution	exonic
1000040	EGFR	c.2573T>G	p.L858R	NM_005228.4	snp	chr7	55259515	0.302115	21	missense	exonic	Gain-of-Function	Hotspot	drug_response
1000040	KRAS	c.182A>G	p.Q61R	NM_033360.3	snp	chr12	25380276	0.18018	3	missense	exonic
1000040	SMO	c.1416G>A	p.D474N	NM_005631.4	snp	chr7	128849189	0.138249	8	missense	exonic
1000043	TP53	c.38_39insC	p.L14fs	NM_000546.5	ins	chr17	7579874	0.354251	2	frameshiftInsertion	exonic	Loss-of-Function	Deleterious	Likely_pathogenic
1300032	TP53	c.643A>G	p.S215G	NM_000546.5	snp	chr17	7578206	1.23077	6	missense	exonic			Likely_pathogenic
1300039	NRAS	c.175G>C	p.A59P	NM_002524.4	snp	chr1	115256536	1.88679	3	missense	exonic
1300075	EGFR	c.2235_2249delGGAATTAAGAGAAGC	p.E746_A750del	NM_005228.4	del	chr7	55242462	5.62944	19	nonframeshiftDeletion	exonic	Gain-of-Function	Hotspot
1300075	EGFR	c.2369C>T	p.T790M	NM_005228.4	snp	chr7	55249071	1.56658	20	missense	exonic	Gain-of-Function	Hotspot	drug_response
1300075	TP53	c.844C>T	p.R282W	NM_000546.5	snp	chr17	7577094	5.9268	8	missense	exonic	Loss-of-Function	Hotspot	Conflicting_interpretations_of_pathogenicity
1700013	EGFR	c.2369C>T	p.T790M	NM_005228.4	snp	chr7	55249071	5.5794	20	missense	exonic	Gain-of-Function	Hotspot	drug_response
1700013	EGFR	c.2573T>G	p.L858R	NM_005228.4	snp	chr7	55259515	11.2078	21	missense	exonic	Gain-of-Function	Hotspot	drug_response
1700013	TP53	c.288delT	p.V97fs	NM_000546.5	del	chr17	7579398	8.50622	4	frameshiftDeletion	exonic	Loss-of-Function	Deleterious
1700013	TP53	c.536_537insC	p.E180*	NM_000546.5	ins	chr17	7578383	1.24858	5	nonsense	exonic	Loss-of-Function	Deleterious
1700057	EGFR	c.2235_2249delGGAATTAAGAGAAGC	p.E746_A750del	NM_005228.4	del	chr7	55242462	1.89573	19	nonframeshiftDeletion	exonic	Gain-of-Function	Hotspot
1700057	GNAS	c.601C>T	p.R201C	NM_000516.5	snp	chr20	57484420	1.38889	8	missense	exonic	Gain-of-Function	Hotspot	Pathogenic/Likely_pathogenic
1700057	TP53	c.715A>G	p.N239D	NM_000546.5	snp	chr17	7577566	1.2987	7	missense	exonic			Conflicting_interpretations_of_pathogenicity
1700061	EGFR	c.2369C>T	p.T790M	NM_005228.4	snp	chr7	55249071	1.9337	20	missense	exonic	Gain-of-Function	Hotspot	drug_response
1700061	EGFR	c.2236_2250delGAATTAAGAGAAGCA	p.E746_A750del	NM_005228.4	del	chr7	55242462	6.99708	19	nonframeshiftDeletion	exonic	Gain-of-Function	Hotspot
2300045	EGFR	c.2369C>T	p.T790M	NM_005228.4	snp	chr7	55249071	3.43915	20	missense	exonic	Gain-of-Function	Hotspot	drug_response
2300045	EGFR	c.2573T>G	p.L858R	NM_005228.4	snp	chr7	55259515	8.79265	21	missense	exonic	Gain-of-Function	Hotspot	drug_response
2800051	EGFR	c.2235_2249delGGAATTAAGAGAAGC	p.E746_A750del	NM_005228.4	del	chr7	55242462	15.052	19	nonframeshiftDeletion	exonic	Gain-of-Function	Hotspot
2800051	TP53	c.733G>A	p.G245S	NM_000546.5	snp	chr17	7577548	7.04441	7	missense	exonic	Loss-of-Function	Hotspot	Pathogenic/Likely_pathogenic
3500015	EGFR	c.2573T>G	p.L858R	NM_005228.4	snp	chr7	55259515	0.467836	21	missense	exonic	Gain-of-Function	Hotspot	drug_response
3500060	EGFR	c.2236_2250delGAATTAAGAGAAGCA	p.E746_A750del	NM_005228.4	del	chr7	55242462	1.77778	19	nonframeshiftDeletion	exonic	Gain-of-Function	Hotspot
3600068	EGFR	c.2573T>G	p.L858R	NM_005228.4	snp	chr7	55259515	0.241196	21	missense	exonic	Gain-of-Function	Hotspot	drug_response
3700071	APC	c.4412G>A	p.S1371K	NM_000038.5	snp	chr5	112175398	0.187617	16	missense	exonic
3700071	EGFR	c.2235_2249delGGAATTAAGAGAAGC	p.E746_A750del	NM_005228.4	del	chr7	55242462	2.40481	19	nonframeshiftDeletion	exonic	Gain-of-Function	Hotspot
3700071	EGFR	c.2369C>T	p.T790M	NM_005228.4	snp	chr7	55249071	1.03493	20	missense	exonic	Gain-of-Function	Hotspot	drug_response
3700071	IDH2	c.420dupC	p.N141Efs	NM_002168.3	ins	chr15	90631930	1.32363	4	frameshiftInsertion	exonic
3900074	EGFR	c.2237_2255delAATTAAGAGAAGCAACATCinsT	p.E746_S752delinsV	NM_005228.4	complex	chr7	55242466	1.15789	19	nonframeshiftBlockSubstitution	exonic	Gain-of-Function	Hotspot
3900074	EGFR	c.2369C>T	p.T790M	NM_005228.4	snp	chr7	55249071	0.542741	20	missense	exonic	Gain-of-Function	Hotspot	drug_response
3900074	SMAD4	c.1082G>A	p.R361H	NM_005359.5	snp	chr18	48591919	0.88249	9	missense	exonic	Loss-of-Function	Hotspot	Pathogenic/Likely_pathogenic
3900074	TP53	c.733G>A	p.G245S	NM_000546.5	snp	chr17	7577548	0.233645	7	missense	exonic	Loss-of-Function	Hotspot	Pathogenic/Likely_pathogenic
4700054	EGFR	c.2236_2250delGAATTAAGAGAAGCA	p.E746_A750del	NM_005228.4	del	chr7	55242462	40.5926	19	nonframeshiftDeletion	exonic	Gain-of-Function	Hotspot
4700054	TP53	c.743G>A	p.R248Q	NM_000546.5	snp	chr17	7577538	32.2848	7	missense	exonic	Loss-of-Function	Hotspot	Pathogenic/Likely_pathogenic
4700070	EGFR	c.2369C>T	p.T790M	NM_005228.4	snp	chr7	55249071	2.72537	20	missense	exonic	Gain-of-Function	Hotspot	drug_response
4700070	EGFR	c.2573T>G	p.L858R	NM_005228.4	snp	chr7	55259515	20.5347	21	missense	exonic	Gain-of-Function	Hotspot	drug_response
4700070	TP53	c.-9G>A	p.?	NM_000546.5	snp	chr17	7579921	0.322543	2	unknown	utr_5
4700070	TP53	c.476C>T	p.A159V	NM_000546.5	snp	chr17	7578454	25.1148	5	missense	exonic	Loss-of-Function	Hotspot	Uncertain_significance
5300044	EGFR	c.2236_2250delGAATTAAGAGAAGCA	p.E746_A750del	NM_005228.4	del	chr7	55242462	10.7036	19	nonframeshiftDeletion	exonic	Gain-of-Function	Hotspot
5300044	EGFR	c.2369C>T	p.T790M	NM_005228.4	snp	chr7	55249071	7.17017	20	missense	exonic	Gain-of-Function	Hotspot	drug_response
5300044	GNAQ	c.623_625delGCCinsCCA	p.G208_Q209delinsAK	NM_002072.4	mnp	chr9	80409488	0.734934	5	missense	exonic
5300044	TP53	c.45delT	p.Q16fs	NM_000546.5	del	chr17	7579867	0.268938	2	frameshiftDeletion	exonic	Loss-of-Function	Deleterious
7200028	TP53	c.643A>G	p.S215G	NM_000546.5	snp	chr17	7578206	0.438596	6	missense	exonic			Likely_pathogenic
7200063	FGFR3	c.1172C>T	p.A391V	NM_000142.4	snp	chr4	1806153	0.2414	9	missense	exonic
7200063	PIK3CA	c.277C>T	p.R93W	NM_006218.3	snp	chr3	178916890	0.458716	2	missense	exonic
7200063	SMAD4	c.1082G>A	p.R361H	NM_005359.5	snp	chr18	48591919	0.854701	9	missense	exonic	Loss-of-Function	Hotspot	Pathogenic/Likely_pathogenic
7800041	TP53	c.735delC	p.M246*	NM_000546.5	del	chr17	7577545	1.08992	7	nonsense	exonic
8500002	EGFR	c.2369C>T	p.T790M	NM_005228.4	snp	chr7	55249071	1.34847	20	missense	exonic	Gain-of-Function	Hotspot	drug_response
8500002	EGFR	c.2573T>G	p.L858R	NM_005228.4	snp	chr7	55259515	9.77411	21	missense	exonic	Gain-of-Function	Hotspot	drug_response
8500002	KRAS	c.34G>A	p.G12S	NM_033360.3	snp	chr12	25398283	0.616592	2	missense	exonic	Gain-of-Function	Hotspot
8500002	TP53	c.839G>T	p.R280I	NM_000546.5	snp	chr17	7577099	0.61665	8	missense	exonic	Loss-of-Function	Hotspot	Conflicting_interpretations_of_pathogenicity
9400005	EGFR	c.865G>C	p.A289P	NM_005228.4	snp	chr7	55221821	0.21692	7	missense	exonic
9400005	EGFR	c.2236_2250delGAATTAAGAGAAGCA	p.E746_A750del	NM_005228.4	del	chr7	55242462	2.73082	19	nonframeshiftDeletion	exonic	Gain-of-Function	Hotspot
9400005	TP53	c.536_537insC	p.E180*	NM_000546.5	ins	chr17	7578383	1.13052	5	nonsense	exonic	Loss-of-Function	Deleterious
9400006	EGFR	c.2236_2250delGAATTAAGAGAAGCA	p.E746_A750del	NM_005228.4	del	chr7	55242462	20.9524	19	nonframeshiftDeletion	exonic	Gain-of-Function	Hotspot
9400006	EGFR	c.2369C>T	p.T790M	NM_005228.4	snp	chr7	55249071	26.3889	20	missense	exonic	Gain-of-Function	Hotspot	drug_response
9400006	TP53	c.854A>G	p.E285G	NM_000546.5	snp	chr17	7577084	6.52174	8	missense	exonic	Loss-of-Function	Hotspot
10100031	TP53	c.536_537insC	p.E180*	NM_000546.5	ins	chr17	7578383	0.530786	5	nonsense	exonic	Loss-of-Function	Deleterious
10100073	FGFR3	c.1111A>T	p.S371C	NM_000142.4	snp	chr4	1806092	0.148148	9	missense	exonic
14600009	TP53	c.475G>A	p.A159T	NM_000546.5	snp	chr17	7578455	0.490196	5	missense	exonic	Loss-of-Function	Hotspot
14600010	EGFR	c.2573T>G	p.L858R	NM_005228.4	snp	chr7	55259515	21.6611	21	missense	exonic	Gain-of-Function	Hotspot	drug_response
14600020	EGFR	c.2369C>T	p.T790M	NM_005228.5	snp	chr7	55249071	3.8835	20	missense	exonic	Gain-of-Function	Hotspot	drug_response
14600020	TP53	c.643A>G	p.S215G	NM_000546.5	snp	chr17	7578206	12.8205	6	missense	exonic			Conflicting_interpretations_of_pathogenicity
03-001	TP53	c.532delC	p.H178Tfs	NM_000546.6	del	chr17	7578383	0.15949	5	frameshiftDeletion	exonic
03-002	BRAF	c.1780G>A	p.D594N	NM_004333.4	snp	chr7	140453154	0.130634	15	missense	exonic
03-002	EGFR	c.2235_2249delGGAATTAAGAGAAGC	p.E746_A750del	NM_005228.4	del	chr7	55242462	52.5126	19	nonframeshiftDeletion	exonic	Gain-of-Function	Hotspot
03-002	MET	CNV	CNV		CNV	chr7	116339104		CNV	CNV		Gain-of-Function	Amplification
03-002	TP53	c.856delG	p.E286fs	NM_000546.5	del	chr17	7577081	34.1815	8	frameshiftDeletion	exonic	Loss-of-Function	Deleterious
03-003	EGFR	c.2236_2250delGAATTAAGAGAAGCA	p.E746_A750del	NM_005228.4	del	chr7	55242462	6.3253	19	nonframeshiftDeletion	exonic	Gain-of-Function	Hotspot
03-003	EGFR	c.2369C>T	p.T790M	NM_005228.4	snp	chr7	55249071	1.83028	20	missense	exonic	Gain-of-Function	Hotspot	drug_response
04-001	EGFR	c.2573T>G	p.L858R	NM_005228.4	snp	chr7	55259515	0.790514	21	missense	exonic
04-001	SF3B1	c.2098A>G	p.K700E	NM_012433.3	snp	chr2	198266834	1.27389	15	missense	exonic
04-002	EGFR	c.2240_2257delTAAGAGAAGCAACATCTC	p.L747_P753delinsS	NM_005228.4	del	chr7	55242462	0.492611	19	nonframeshiftDeletion	exonic	Gain-of-Function	Hotspot
04-004	EGFR	c.2236_2250delGAATTAAGAGAAGCA	p.E746_A750del	NM_005228.4	del	chr7	55242462	43.2111	19	nonframeshiftDeletion	exonic	Gain-of-Function	Hotspot
04-004	TP53	c.577C>T	p.H193Y	NM_000546.5	snp	chr17	7578272	0.277906	6	missense	exonic	Loss-of-Function	Hotspot	Likely_pathogenic
04-005	EGFR	c.2236_2250delGAATTAAGAGAAGCA	p.E746_A750del	NM_005228.4	del	chr7	55242462	17.1429	19	nonframeshiftDeletion	exonic	Gain-of-Function	Hotspot
04-005	EGFR	c.2369C>T	p.T790M	NM_005228.4	snp	chr7	55249071	2.03046	20	missense	exonic	Gain-of-Function	Hotspot	drug_response
04-006	FBXW7	c.1436G>A	p.R479Q	NM_033632.3	snp	chr4	153247366	0.128535	10	missense	exonic
04-010	EGFR	c.2239_2240delTTinsCC	p.L747P	NM_005228.5	mnp	chr7	55242462	54.5126	19	missense	exonic	Gain-of-Function	Hotspot	Uncertain_significance
04-010	FGFR3	c.742C>T	p.R248C	NM_000142.5	snp	chr4	1803564	0.421941	7	missense	exonic
04-010	TP53	c.1123C>T	p.Q375*	NM_000546.6	snp	chr17	7572986	15.6863	11	nonsense	exonic	Loss-of-Function	Truncating	Uncertain_significance
04-010	RET	c.1894G>T	p.E632*	NM_020975.6	snp	chr10	43609941	0.196078	11	nonsense	exonic
04-010	TP53	c.405C>A	p.C135*	NM_000546.6	snp	chr17	7578525	0.238949	5	nonsense	exonic
04-016	EGFR	c.2573T>G	p.L858R	NM_005228.5	snp	chr7	55259515	0.567706	21	missense	exonic	Gain-of-Function	Hotspot	drug_response
04-016	ERBB2	c.929C>T	p.S310F	NM_004448.4	snp	chr17	37868208	0.573959	8	missense	exonic	Gain-of-Function	Hotspot	Likely_pathogenic
04-016	TP53	c.45delT	p.Q16RfsTer28	NM_000546.6	del	chr17	7579867	0.189974	2	frameshiftDeletion	exonic			Pathogenic
05-003	EGFR	c.2311_2312insGCGTGGACA	p.A767_S768insSVD	NM_005228.4	ins	chr7	55249002	14.3187	20	nonframeshiftInsertion	exonic	Gain-of-Function	Hotspot	Likely_pathogenic,_drug_response
05-003	TP53	c.392A>T	p.N131I	NM_000546.5	snp	chr17	7578538	1.55211	5	missense	exonic			Likely_pathogenic
05-006	EGFR	c.2236_2250delGAATTAAGAGAAGCA	p.E746_A750del	NM_005228.4	del	chr7	55242462	4.07751	19	nonframeshiftDeletion	exonic	Gain-of-Function	Hotspot
05-006	TP53	c.853G>A	p.E285K	NM_000546.5	snp	chr17	7577085	1.40987	8	missense	exonic	Loss-of-Function	Hotspot	Likely_pathogenic
06-003	IDH2	c.420dupC	p.N141Efs	NM_002168.4	ins	chr15	90631930	4.57317	4	frameshiftInsertion	exonic
06-003	TP53	c.751_752insC	p.I251TfsTer13	NM_000546.6	ins	chr17	7577529	1.93237	7	frameshiftInsertion	exonic	Loss-of-Function	Truncating
06-005	EGFR	c.2369C>T	p.T790M	NM_005228.5	snp	chr7	55249071	0.353357	20	missense	exonic	Gain-of-Function	Hotspot	drug_response
06-005	TP53	c.817C>T	p.R273C	NM_000546.6	snp	chr17	7577121	0.338219	8	missense	exonic
06-005	TP53	c.743G>A	p.R248Q	NM_000546.6	snp	chr17	7577538	0.11919	7	missense	exonic
06-006	EGFR	c.2573T>G	p.L858R	NM_005228.5	snp	chr7	55259515	0.142959	21	missense	exonic
06-006	KIT	c.1924A>G	p.K642E	NM_000222.3	snp	chr4	55594221	0.277778	13	missense	exonic
06-006	MAP2K1	c.170A>G	p.K57R	NM_002755.4	snp	chr15	66727454	0.133907	2	missense	exonic
06-006	MET	c.3804G>A	p.M1268I	NM_001127500.3	snp	chr7	116423475	0.361925	19	missense	exonic
06-006	MTOR	c.4447T>C	p.C1483R	NM_004958.4	snp	chr1	11217231	0.190009	30	missense	exonic	Gain-of-Function	Hotspot	Pathogenic/Likely_pathogenic
06-006	PIK3CA	c.1258T>C	p.C420R	NM_006218.4	snp	chr3	178927980	0.40395	8	missense	exonic
06-006	TP53	c.430C>T	p.Q144*	NM_000546.6	snp	chr17	7578500	0.27946	5	nonsense	exonic			Pathogenic
06-006	TP53	c.718A>G	p.S240G	NM_000546.6	snp	chr17	7577563	0.485561	7	missense	exonic	Loss-of-Function	Hotspot	Conflicting_interpretations_of_pathogenicity
06-006	TP53	c.788A>G	p.N263S	NM_000546.6	snp	chr17	7577150	0.563502	8	missense	exonic			Likely_benign
06-006	TP53	c.802A>G	p.N268D	NM_000546.6	snp	chr17	7577136	0.41179	8	missense	exonic
06-006	TP53	c.863A>G	p.N288S	NM_000546.6	snp	chr17	7577075	1.71478	8	missense	exonic
06-006	TP53	c.916C>T	p.R306*	NM_000546.6	snp	chr17	7577022	0.32163	8	nonsense	exonic			Pathogenic
06-006	BRAF	c.1786G>A	p.G596S	NM_004333.6	snp	chr7	140453149	0.199645	15	missense	exonic
06-006	ERBB2	c.1979G>A	p.G660D	NM_004448.4	snp	chr17	37879600	0.250348	17	missense	exonic
06-006	TP53	c.403T>C	p.C135R	NM_000546.6	snp	chr17	7578526	0.326112	5	missense	exonic
06-006	TP53	c.476C>A	p.A159D	NM_000546.6	snp	chr17	7578454	0.232883	5	missense	exonic
06-010	EGFR	c.2369C>T	p.T790M	NM_005228.4	snp	chr7	55249071	7.03606	20	missense	exonic	Gain-of-Function	Hotspot	drug_response
06-010	EGFR	c.2573T>G	p.L858R	NM_005228.4	snp	chr7	55259515	8.28875	21	missense	exonic	Gain-of-Function	Hotspot	drug_response
06-010	TP53	c.442G>A	p.D148N	NM_000546.5	snp	chr17	7578488	0.142839	5	missense	exonic
06-010	TP53	c.45delT	p.Q16fs	NM_000546.5	del	chr17	7579867	1.11555	2	frameshiftDeletion	exonic	Loss-of-Function	Deleterious
06-010	TP53	c.810T>A	p.F270L	NM_000546.5	snp	chr17	7577128	0.361119	8	missense	exonic
06-010	TP53	c.532delC	p.H178Tfs	NM_000546.5	del	chr17	7578383	0.109007	5	frameshiftDeletion	exonic
08-010	EGFR	c.2235_2249delGGAATTAAGAGAAGC	p.E746_A750del	NM_005228.4	del	chr7	55242462	7.43243	19	nonframeshiftDeletion	exonic	Gain-of-Function	Hotspot
08-010	EGFR	c.2369C>T	p.T790M	NM_005228.4	snp	chr7	55249071	1.20818	20	missense	exonic	Gain-of-Function	Hotspot	drug_response
08-010	EGFR	c.2497T>G	p.L833V	NM_005228.4	snp	chr7	55259439	1.19592	21	missense	exonic	Gain-of-Function	Hotspot	Uncertain_significance
08-010	PTEN	c.517C>T	p.R173C	NM_000314.6	snp	chr10	89711899	0.361664	6	missense	exonic	Loss-of-Function	Hotspot	Pathogenic/Likely_pathogenic
11-002	EGFR	c.2573T>G	p.L858R	NM_005228.5	snp	chr7	55259515	0.293255	21	missense	exonic
11-002	TP53	c.38delC	p.P13LfsTer2	NM_000546.6	del	chr17	7579874	0.193424	2	frameshiftDeletion	exonic
11-002	TP53	c.856G>A	p.E286K	NM_000546.6	snp	chr17	7577082	0.940439	8	missense	exonic	Loss-of-Function	Hotspot	Pathogenic
11-002	MAP2K1	c.609dupG	p.I204Dfs	NM_002755.4	ins	chr15	66774131	5.2356	6	frameshiftInsertion	exonic
11-004	EGFR	c.2235_2249delGGAATTAAGAGAAGC	p.E746_A750del	NM_005228.5	del	chr7	55242462	1.38889	19	nonframeshiftDeletion	exonic	Gain-of-Function	EGFRExon19Deletion	drug_response
11-004	ESR1	c.1613A>G	p.D538G	NM_001122740.2	snp	chr6	152419926	1.0582	9	missense	exonic
11-004	FGFR2	c.755C>T	p.S252L	NM_000141.5	snp	chr10	123279677	1.27389	7	missense	exonic
11-004	ESR1	c.1609T>C	p.Y537H	NM_001122740.2	snp	chr6	152419922	1.0582	9	missense	exonic
11-006	EGFR	c.2582T>A	p.L861Q	NM_005228.4	snp	chr7	55259524	2.14704	21	missense	exonic	Gain-of-Function	Hotspot	Pathogenic/Likely_pathogenic,_drug_response
11-006	KRAS	c.34G>T	p.G12C	NM_033360.3	snp	chr12	25398283	18.1153	2	missense	exonic	Gain-of-Function	Hotspot
11-006	TP53	c.388C>G	p.L130V	NM_000546.5	snp	chr17	7578542	6.73913	5	missense	exonic			Uncertain_significance
11-008	EGFR	c.2235_2249delGGAATTAAGAGAAGC	p.E746_A750del	NM_005228.4	del	chr7	55242462	26.2222	19	nonframeshiftDeletion	exonic	Gain-of-Function	Hotspot
11-008	EGFR	c.2369C>T	p.T790M	NM_005228.4	snp	chr7	55249071	4.49438	20	missense	exonic	Gain-of-Function	Hotspot	drug_response
11-008	PIK3CA	c.1633G>A	p.E545K	NM_006218.3	snp	chr3	178936091	0.669643	10	missense	exonic	Gain-of-Function	Hotspot	Pathogenic/Likely_pathogenic
13-002	EGFR	c.2369C>T	p.T790M	NM_005228.5	snp	chr7	55249071	4.54545	20	missense	exonic	Gain-of-Function	Hotspot	drug_response
13-002	EGFR	c.2573T>G	p.L858R	NM_005228.5	snp	chr7	55259515	5.42636	21	missense	exonic	Gain-of-Function	Hotspot	drug_response
13-002	FGFR3	c.1172C>A	p.A391E	NM_000142.4	snp	chr4	1806153	1.41844	9	missense	exonic
13-002	TP53	c.634T>G	p.F212V	NM_000546.5	snp	chr17	7578215	3.6036	6	missense	exonic
13-003	ALK	c.3387A>G	p.E1129G	NM_004304.5	snp	chr2	29445447	0.200401	21	missense	exonic
13-003	MTOR	c.6617A>G	p.N2206S	NM_004958.4	snp	chr1	11184600	0.46729	47	missense	exonic
13-003	NRAS	c.37G>A	p.G13S	NM_002524.5	snp	chr1	115258745	0.23753	2	missense	exonic
13-003	RET	c.1900T>C	p.C634R	NM_020975.6	snp	chr10	43609941	0.284495	11	missense	exonic
13-003	TP53	c.578A>G	p.H193R	NM_000546.6	snp	chr17	7578271	0.343249	6	missense	exonic
13-005	APC	c.3930dupA	p.I1311Dfs	NM_000038.5	ins	chr5	112175211	0.115154	16	frameshiftInsertion	exonic
13-005	EGFR	c.2235_2249delGGAATTAAGAGAAGC	p.E746_A750del	NM_005228.4	del	chr7	55242462	1.30836	19	nonframeshiftDeletion	exonic	Gain-of-Function	Hotspot
13-005	EGFR	c.2369C>T	p.T790M	NM_005228.4	snp	chr7	55249071	0.47532	20	missense	exonic	Gain-of-Function	Hotspot	drug_response
13-005	FGFR2	c.1976delA	p.K659Rfs	NM_000141.4	del	chr10	123247514	0.135648	14	frameshiftDeletion	exonic
13-006	EGFR	c.2369C>T	p.T790M	NM_005228.5	snp	chr7	55249071	0.27027	20	missense	exonic	Gain-of-Function	Hotspot
13-008	RET	c.1894G>T	p.E632*	NM_020975.6	snp	chr10	43609941	0.710059	11	nonsense	exonic
13-008	PDGFRA	c.1675dupT	p.W559Lfs	NM_006206.6	ins	chr4	55141028	0.909091	12	frameshiftInsertion	exonic
13-008	EGFR	c.2369C>T	p.T790M	NM_005228.5	snp	chr7	55249071	0.588235	20	missense	exonic
13-009	EGFR	c.2240_2254delTAAGAGAAGCAACAT	p.L747_T751del	NM_005228.4	del	chr7	55242462	1.44928	19	nonframeshiftDeletion	exonic	Gain-of-Function	Hotspot
13-009	EGFR	c.2369C>T	p.T790M	NM_005228.4	snp	chr7	55249071	0.239425	20	missense	exonic	Gain-of-Function	Hotspot	drug_response
13-009	TP53	c.658T>G	p.Y220D	NM_000546.5	snp	chr17	7578191	1.19183	6	missense	exonic	Loss-of-Function	Hotspot	Likely_pathogenic
13-010	APC	c.4059delA	p.E1353Dfs	NM_000038.6	del	chr5	112175348	0.256805	16	frameshiftDeletion	exonic
13-010	ERBB2	c.1979G>A	p.G660D	NM_004448.4	snp	chr17	37879600	0.170358	17	missense	exonic
13-010	TP53	c.422G>T	p.C141F	NM_000546.6	snp	chr17	7578508	0.153233	5	missense	exonic
13-010	TP53	c.311_312delAGinsCA	p.Q104P	NM_000546.6	mnp	chr17	7579375	1.44509	4	missense	exonic
13-014	BRAF	c.1799T>A	p.V600E	NM_004333.4	snp	chr7	140453134	1.60321	15	missense	exonic	Gain-of-Function	Hotspot
13-014	EGFR	c.2369C>T	p.T790M	NM_005228.4	snp	chr7	55249071	0.569801	20	missense	exonic
13-014	EGFR	c.2240_2257delTAAGAGAAGCAACATCTC	p.L747_P753delinsS	NM_005228.4	del	chr7	55242462	23.8532	19	nonframeshiftDeletion	exonic	Gain-of-Function	Hotspot
13-014	TP53	c.857A>C	p.E286A	NM_000546.5	snp	chr17	7577081	21.7391	8	missense	exonic	Loss-of-Function	Hotspot	Likely_pathogenic
13-015	EGFR	CNV	CNV		CNV	chr7	55211063		CNV	CNV		Gain-of-Function	Amplification
13-015	EGFR	c.2236_2250delGAATTAAGAGAAGCA	p.E746_A750del	NM_005228.4	del	chr7	55242462	77.668	19	nonframeshiftDeletion	exonic	Gain-of-Function	Hotspot
13-015	EGFR	c.2369C>T	p.T790M	NM_005228.4	snp	chr7	55249070	15.1845	20	missense	exonic	Gain-of-Function	Hotspot
13-015	TP53	c.586C>T	p.R196*	NM_000546.5	snp	chr17	7578263	39.9863	6	nonsense	exonic	Loss-of-Function	Deleterious	Pathogenic
13-016	MAP2K1	c.172dupC	p.Q58Pfs	NM_002755.4	ins	chr15	66727455	0.273785	2	frameshiftInsertion	exonic
13-016	EGFR	c.2582T>A	p.L861Q	NM_005228.5	snp	chr7	55259524	0.758808	21	missense	exonic
13-017	APC	c.4081C>A	p.P1361T	NM_000038.5	snp	chr5	112175371	0.833333	16	missense	exonic
13-017	EGFR	c.2311_2312insGCGTGGACA	p.A767_S768insSVD	NM_005228.4	ins	chr7	55249002	8.29268	20	nonframeshiftInsertion	exonic	Gain-of-Function	Hotspot	Likely_pathogenic,_drug_response
13-017	TP53	c.451C>G	p.P151A	NM_000546.5	snp	chr17	7578479	0.724638	5	missense	exonic
13-019	MET	c.3689A>T	p.Y1230F	NM_001127500.3	snp	chr7	116423414	0.664452	19	missense	exonic
13-019	EGFR	c.2369C>T	p.T790M	NM_005228.5	snp	chr7	55249071	4.40529	20	missense	exonic	Gain-of-Function	Hotspot	drug_response
13-019	EGFR	c.2573T>G	p.L858R	NM_005228.5	snp	chr7	55259515	4.82509	21	missense	exonic	Gain-of-Function	Hotspot	drug_response
13-019	FBXW7	c.1745C>T	p.S582L	NM_033632.3	snp	chr4	153245446	0.34904	11	missense	exonic
13-019	TP53	c.523C>A	p.R175N	NM_000546.6	snp	chr17	7578407	0.31348	5	missense	exonic
13-020	SMO	c.1921C>A	p.P641T	NM_005631.4	snp	chr7	128851596	0.761905	11	missense	exonic
13-021	APC	c.4111delA	p.S1371Vfs	NM_000038.6	del	chr5	112175398	0.130548	16	frameshiftDeletion	exonic
13-021	EGFR	c.2573T>G	p.L858R	NM_005228.5	snp	chr7	55259515	9.0455	21	missense	exonic	Gain-of-Function	Hotspot	drug_response
13-021	FGFR3	c.1108G>T	p.G370C	NM_000142.5	snp	chr4	1806089	0.107066	9	missense	exonic
13-021	TP53	c.454C>A	p.P152T	NM_000546.6	snp	chr17	7578476	0.223881	5	missense	exonic
13-023	APC	c.3907C>A	p.Q1303K	NM_000038.6	snp	chr5	112175198	1.24481	16	missense	exonic
13-023	EGFR	c.2543C>A	p.P848Q	NM_005228.5	snp	chr7	55259485	0.74813	21	missense	exonic
13-024	EGFR	c.2240_2257delTAAGAGAAGCAACATCTC	p.L747_P753delinsS	NM_005228.4	del	chr7	55242462	0.759219	19	nonframeshiftDeletion	exonic	Gain-of-Function	Hotspot
13-024	EGFR	c.2369C>T	p.T790M	NM_005228.4	snp	chr7	55249071	0.404449	20	missense	exonic	Gain-of-Function	Hotspot	drug_response
13-024	FBXW7	c.1393C>T	p.R465C	NM_033632.3	snp	chr4	153249385	0.149365	9	missense	exonic
13-024	TP53	c.38_39insC	p.L14fs	NM_000546.5	ins	chr17	7579874	0.193705	2	frameshiftInsertion	exonic	Loss-of-Function	Deleterious	Likely_pathogenic
13-027	EGFR	c.2235_2249delGGAATTAAGAGAAGC	p.E746_A750del	NM_005228.5	del	chr7	55242462	1.9802	19	nonframeshiftDeletion	exonic	Gain-of-Function	EGFRExon19Deletion	drug_response
13-027	NRAS	c.35G>A	p.G12D	NM_002524.5	snp	chr1	115258746	0.529101	2	missense	exonic	Gain-of-Function	Hotspot	Pathogenic
13-027	TP53	c.443A>G	p.D148G	NM_000546.6	snp	chr17	7578487	0.928074	5	missense	exonic
13-027	TP53	c.536A>G	p.H179R	NM_000546.6	snp	chr17	7578383	0.730371	5	missense	exonic	Loss-of-Function	Hotspot	Conflicting_interpretations_of_pathogenicity
13-027	PDGFRA	c.1679G>A	p.R560K	NM_006206.6	snp	chr4	55141028	0.527009	12	missense	exonic
13-027	RET	c.1903C>T	p.E635C	NM_020975.6	snp	chr10	43609941	0.188501	11	missense	exonic			Uncertain_significance
13-027	TP53	c.394A>T	p.K132*	NM_000546.6	snp	chr17	7578536	0.185701	5	nonsense	exonic
13-029	SMAD4	c.1081C>G	p.R361G	NM_005359.5	snp	chr18	48591918	1.32948	9	missense	exonic	Loss-of-Function	Hotspot	Pathogenic/Likely_pathogenic
13-030	EGFR	c.2235_2249delGGAATTAAGAGAAGC	p.E746_A750del	NM_005228.5	del	chr7	55242462	8.41121	19	nonframeshiftDeletion	exonic	Gain-of-Function	EGFRExon19Deletion	drug_response
13-030	EGFR	c.2369C>T	p.T790M	NM_005228.5	snp	chr7	55249071	4.5977	20	missense	exonic	Gain-of-Function	Hotspot	drug_response
13-031	AKT1	c.49G>A	p.E17K	NM_001014431.2	snp	chr14	105246551	0.434783	3	missense	exonic
13-031	BRAF	c.1397G>A	p.G466E	NM_004333.6	snp	chr7	140481411	0.282752	11	missense	exonic
13-031	EGFR	c.2573T>G	p.L858R	NM_005228.5	snp	chr7	55259515	12.1387	21	missense	exonic	Gain-of-Function	Hotspot	drug_response
13-031	ESR1	c.1387T>C	p.S463P	NM_001122740.2	snp	chr6	152415537	0.124456	8	missense	exonic
13-031	SMAD4	c.1081C>T	p.R361C	NM_005359.6	snp	chr18	48591918	0.99108	9	missense	exonic	Loss-of-Function	Hotspot	Pathogenic
13-031	TP53	c.527G>T	p.C176F	NM_000546.6	snp	chr17	7578383	4.40882	5	missense	exonic	Loss-of-Function	Hotspot	Likely_pathogenic
13-037	ERBB3	c.310G>T	p.V104L	NM_001982.4	snp	chr12	56478854	0.869565	3	missense	exonic
13-037	RET	c.1903C>T	p.R635C	NM_020975.6	snp	chr10	43609941	1.90311	11	missense	exonic			Uncertain_significance
15-003	AR	c.2643_2645delGCT	p.L881del	NM_000044.4	del	chrX	66943560	0.299401	8	nonframeshiftDeletion	exonic
15-003	CTNNB1	c.101G>T	p.G34V	NM_001904.3	snp	chr3	41266104	10.5072	3	missense	exonic	Gain-of-Function	Hotspot	Conflicting_interpretations_of_pathogenicity
15-003	EGFR	c.2236_2250delGAATTAAGAGAAGCA	p.E746_A750del	NM_005228.4	del	chr7	55242462	13.7998	19	nonframeshiftDeletion	exonic	Gain-of-Function	Hotspot
15-003	EGFR	c.2369C>T	p.T790M	NM_005228.4	snp	chr7	55249071	9.44	20	missense	exonic	Gain-of-Function	Hotspot	drug_response
15-003	FBXW7	c.2065C>T	p.R689W	NM_033632.3	snp	chr4	153244092	0.163132	12	missense	exonic
15-003	HRAS	c.183G>T	p.Q61H	NM_001130442.2	snp	chr11	533873	0.402414	3	missense	exonic
15-003	TP53	c.527G>T	p.C176F	NM_000546.5	snp	chr17	7578403	0.27894	5	missense	exonic
15-003	TP53	c.536_537insC	p.E180*	NM_000546.5	ins	chr17	7578383	1.88679	5	nonsense	exonic	Loss-of-Function	Deleterious
15-003	MTOR	c.4449C>A	p.C1483*	NM_004958.3	snp	chr1	11217229	0.230415	30	nonsense	exonic
15-004	EGFR	c.2573T>G	p.L858R	NM_005228.4	snp	chr7	55259515	3.1746	21	missense	exonic
15-005	EGFR	c.2308_2309insCCAGCGTGG	p.M766_A767insASV	NM_005228.4	ins	chr7	55248998	5.35714	20	nonframeshiftInsertion	exonic	Gain-of-Function	Hotspot	drug_response
15-007	APC	c.2805C>A	p.Y935*	NM_000038.6	snp	chr5	112174096	0.826446	16	nonsense	exonic	Loss-of-Function	Truncating	Pathogenic
15-008	TP53	c.1081G>T	p.G361W	NM_000546.6	snp	chr17	7573946	1.41388	10	missense	exonic
15-009	EGFR	c.2235_2249delGGAATTAAGAGAAGC	p.E746_A750del	NM_005228.4	del	chr7	55242462	46.2247	19	nonframeshiftDeletion	exonic	Gain-of-Function	Hotspot
15-009	EGFR	c.2369C>T	p.T790M	NM_005228.4	snp	chr7	55249071	6.91489	20	missense	exonic	Gain-of-Function	Hotspot	drug_response
15-009	TP53	c.584T>C	p.I195T	NM_000546.5	snp	chr17	7578265	5.03597	6	missense	exonic	Loss-of-Function	Hotspot	Pathogenic/Likely_pathogenic
15-010	ERBB2	c.1979G>A	p.G660D	NM_004448.3	snp	chr17	37879600	1.33333	17	missense	exonic
15-012	EGFR	CNV	CNV		CNV	chr7	55211063		CNV	CNV		Gain-of-Function	Amplification
15-012	EGFR	c.2235_2249delGGAATTAAGAGAAGC	p.E746_A750del	NM_005228.5	del	chr7	55242462	67.9223	19	nonframeshiftDeletion	exonic	Gain-of-Function	EGFRExon19Deletion	drug_response
15-012	EGFR	c.2369C>T	p.T790M	NM_005228.5	snp	chr7	55249071	0.239015	20	missense	exonic	Gain-of-Function	Hotspot	drug_response
15-012	TP53	c.743G>A	p.R248Q	NM_000546.6	snp	chr17	7577538	0.271003	7	missense	exonic	Loss-of-Function	Hotspot	Pathogenic
15-017	EGFR	c.2236_2250delGAATTAAGAGAAGCA	p.E746_A750del	NM_005228.4	del	chr7	55242462	1.90955	19	nonframeshiftDeletion	exonic	Gain-of-Function	Hotspot
15-017	EGFR	c.2369C>T	p.T790M	NM_005228.4	snp	chr7	55249071	0.874636	20	missense	exonic	Gain-of-Function	Hotspot	drug_response
15-017	IDH2	c.420dupC	p.N141Efs	NM_002168.3	ins	chr15	90631930	0.97629	4	frameshiftInsertion	exonic
15-017	SF3B1	c.2098A>G	p.K700E	NM_012433.3	snp	chr2	198266834	0.283688	15	missense	exonic
15-017	TP53	c.842A>G	p.D281G	NM_000546.5	snp	chr17	7577096	0.997151	8	missense	exonic			Pathogenic/Likely_pathogenic
15-018	EGFR	c.2237_2255delAATTAAGAGAAGCAACATCinsT	p.E746_S752delinsV	NM_005228.4	complex	chr7	55242466	4.56989	19	nonframeshiftBlockSubstitution	exonic	Gain-of-Function	Hotspot
15-018	EGFR	c.2369C>T	p.T790M	NM_005228.4	snp	chr7	55249071	2.58621	20	missense	exonic	Gain-of-Function	Hotspot	drug_response
15-018	FBXW7	c.1393C>T	p.R465C	NM_033632.3	snp	chr4	153249385	0.135227	9	missense	exonic
15-018	FGFR3	c.1172C>T	p.A391V	NM_000142.4	snp	chr4	1806153	0.270375	9	missense	exonic
15-019	FGFR3	c.2150A>G	p.K717R	NM_000142.4	snp	chr4	1808386	0.954654	16	missense	exonic
18-001	EGFR	c.2573T>G	p.L858R	NM_005228.4	snp	chr7	55259515	53.1915	21	missense	exonic	Gain-of-Function	Hotspot	drug_response
18-001	SF3B1	c.2098A>G	p.K700E	NM_012433.3	snp	chr2	198266834	2.08333	15	missense	exonic	Gain-of-Function	Hotspot	Likely_pathogenic
18-001	SMO	c.961G>A	p.V321M	NM_005631.4	snp	chr7	128846031	2.52101	5	missense	exonic	Gain-of-Function	Hotspot
18-001	TP53	c.731G>A	p.G244D	NM_000546.5	snp	chr17	7577550	4.47761	7	missense	exonic	Loss-of-Function	Hotspot	Likely_pathogenic
19-001	EGFR	CNV	CNV		CNV	chr7	55211063		CNV	CNV		Gain-of-Function	Amplification
19-001	EGFR	c.2235_2249delGGAATTAAGAGAAGC	p.E746_A750del	NM_005228.5	del	chr7	55242462	12.5	19	nonframeshiftDeletion	exonic	Gain-of-Function	EGFRExon19Deletion	drug_response
19-001	EGFR	c.2369C>T	p.T790M	NM_005228.5	snp	chr7	55249071	3.26797	20	missense	exonic	Gain-of-Function	Hotspot	drug_response
19-001	SMAD4	c.353C>A	p.A118E	NM_005359.6	snp	chr18	48575159	2.7027	3	missense	exonic
19-002	EGFR	c.2235_2249delGGAATTAAGAGAAGC	p.E746_A750del	NM_005228.4	del	chr7	55242462	2.68456	19	nonframeshiftDeletion	exonic	Gain-of-Function	Hotspot
19-003	CTNNB1	c.101G>T	p.G34V	NM_001904.3	snp	chr3	41266104	0.340136	3	missense	exonic
19-003	ERBB2	c.929C>A	p.S310Y	NM_004448.3	snp	chr17	37868208	0.243309	8	missense	exonic
19-003	TP53	c.742C>T	p.R248W	NM_000546.5	snp	chr17	7577539	0.297177	7	missense	exonic
19-005	CTNNB1	c.134C>T	p.S45F	NM_001904.3	snp	chr3	41266136	11.7512	3	missense	exonic	Gain-of-Function	Hotspot
19-005	EGFR	c.2236_2250delGAATTAAGAGAAGCA	p.E746_A750del	NM_005228.4	del	chr7	55242462	16.6667	19	nonframeshiftDeletion	exonic	Gain-of-Function	Hotspot
19-005	KIT	c.1588G>A	p.V530I	NM_000222.2	snp	chr4	55593431	0.549451	10	missense	exonic
19-008	EGFR	c.2235_2249delGGAATTAAGAGAAGC	p.E746_A750del	NM_005228.4	del	chr7	55242462	0.906583	19	nonframeshiftDeletion	exonic	Gain-of-Function	Hotspot
19-008	TP53	c.818G>A	p.R273H	NM_000546.5	snp	chr17	7577120	0.11383	8	missense	exonic
19-008	TP53	c.659A>G	p.Y220C	NM_000546.5	snp	chr17	7578190	0.10921	6	missense	exonic	Loss-of-Function	Hotspot	Pathogenic/Likely_pathogenic
19-008	TP53	c.841G>A	p.D281N	NM_000546.5	snp	chr17	7577097	0.11383	8	missense	exonic			Likely_pathogenic
19-010	EGFR	c.2240_2257delTAAGAGAAGCAACATCTC	p.L747_P753delinsS	NM_005228.4	del	chr7	55242462	23.4201	19	nonframeshiftDeletion	exonic	Gain-of-Function	Hotspot
19-010	EGFR	c.2369C>T	p.T790M	NM_005228.4	snp	chr7	55249071	3.9604	20	missense	exonic	Gain-of-Function	Hotspot	drug_response
19-010	TP53	c.388C>T	p.L130F	NM_000546.5	snp	chr17	7578542	8.0292	5	missense	exonic			Uncertain_significance
20-001	APC	c.3907C>A	p.Q1303K	NM_000038.5	snp	chr5	112175398	0.152149	16	missense	exonic
20-001	EGFR	c.2257C>A	p.P753G	NM_005228.4	snp	chr7	55242479	0.251099	19	missense	exonic
20-001	EGFR	c.2573T>G	p.L858R	NM_005228.4	snp	chr7	55259515	13.2518	21	missense	exonic	Gain-of-Function	Hotspot	drug_response
20-001	TP53	c.45delT	p.Q16fs	NM_000546.5	del	chr17	7579867	0.209864	2	frameshiftDeletion	exonic	Loss-of-Function	Deleterious
21-002	MAP2K1	c.371C>T	p.P124L	NM_002755.3	snp	chr15	66729163	0.168209	3	missense	exonic
21-002	TP53	c.441delT	p.D148fs	NM_000546.5	del	chr17	7578488	0.30722	5	frameshiftDeletion	exonic	Loss-of-Function	Deleterious
21-002	TP53	c.590delT	p.V197fs	NM_000546.5	del	chr17	7578258	0.16	6	frameshiftDeletion	exonic	Loss-of-Function	Deleterious
21-004	EGFR	c.2235_2249delGGAATTAAGAGAAGC	p.E746_A750del	NM_005228.4	del	chr7	55242462	70.7317	19	nonframeshiftDeletion	exonic	Gain-of-Function	Hotspot
21-005	EGFR	c.2235_2249delGGAATTAAGAGAAGC	p.E746_A750del	NM_005228.5	del	chr7	55242462	61.7021	19	nonframeshiftDeletion	exonic	Gain-of-Function	EGFRExon19Deletion
21-005	EGFR	c.2369C>T	p.T790M	NM_005228.5	snp	chr7	55249070	39.9323	20	missense	exonic	Gain-of-Function	Hotspot	drug_response
21-005	ERBB2	CNV	CNV		CNV	chr17	37863181		CNV	CNV		Gain-of-Function	Amplification
21-005	TP53	c.536_537insC	p.H179Qfs	NM_000546.5	ins	chr17	7578383	1.53322	5	frameshiftInsertion	exonic
25-007	EGFR	c.2573T>G	p.L858R	NM_005228.5	snp	chr7	55259515	0.31264	21	missense	exonic	Gain-of-Function	Hotspot	drug_response
25-011	KIT	c.1502C>T	p.S501F	NM_000222.3	snp	chr4	55592178	1.50538	9	missense	exonic
25-011	EGFR	c.2369C>T	p.T790M	NM_005228.5	snp	chr7	55249071	2.44755	20	missense	exonic	Gain-of-Function	Hotspot	drug_response
25-011	EGFR	c.2573T>G	p.L858R	NM_005228.5	snp	chr7	55259515	15.8545	21	missense	exonic	Gain-of-Function	Hotspot	drug_response
25-011	PDGFRA	c.1681G>T	p.V561F	NM_006206.6	snp	chr4	55141028	2.02361	12	missense	exonic
26-003	FGFR3	c.1195C>T	p.R399C	NM_000142.4	snp	chr4	1806176	0.271601	9	missense	exonic	Gain-of-Function	Hotspot
26-003	MET	c.3082+2T>G	p.?	NM_001127500.2	snp	chr7	116412045	0.184843	14	unknown	splicesite_5
26-003	MTOR	c.6628G>T	p.A2210S	NM_004958.3	snp	chr1	11184589	0.3125	47	missense	exonic
26-003	TP53	c.45delT	p.Q16fs	NM_000546.5	del	chr17	7579867	0.351741	2	frameshiftDeletion	exonic	Loss-of-Function	Deleterious
26-004	APC	c.4473dupT	p.A1492Cfs	NM_000038.5	ins	chr5	112175760	0.433168	16	frameshiftInsertion	exonic
26-004	KRAS	c.436G>A	p.A146T	NM_033360.3	snp	chr12	25378562	0.186741	4	missense	exonic
26-004	PIK3CA	c.2179dupA	p.T727Nfs	NM_006218.3	ins	chr3	178938934	0.2731	14	frameshiftInsertion	exonic
26-005	APC	c.2413C>T	p.R805*	NM_000038.5	snp	chr5	112173704	0.142197	16	nonsense	exonic	Loss-of-Function	Deleterious	Pathogenic
26-005	EGFR	c.2573T>G	p.L858R	NM_005228.4	snp	chr7	55259515	55.744	21	missense	exonic	Gain-of-Function	Hotspot	drug_response
26-005	TP53	c.743G>T	p.R248L	NM_000546.5	snp	chr17	7577538	0.149365	7	missense	exonic	Loss-of-Function	Hotspot	Likely_pathogenic
27-001	APC	c.2626C>T	p.R876*	NM_000038.5	snp	chr5	112173917	0.211864	16	nonsense	exonic
27-001	TP53	c.45delT	p.Q16fs	NM_000546.5	del	chr17	7579867	0.603969	2	frameshiftDeletion	exonic	Loss-of-Function	Deleterious
27-001	TP53	c.763A>C	p.I255L	NM_000546.5	snp	chr17	7577518	0.9375	7	missense	exonic
27-001	TP53	c.530C>A	p.P177H	NM_000546.5	snp	chr17	7578383	0.252207	5	missense	exonic
27-002	APC	c.4222G>C	p.E1408Q	NM_000038.6	snp	chr5	112175513	0.2886	16	missense	exonic
27-002	EGFR	c.2573T>G	p.L858R	NM_005228.5	snp	chr7	55259515	0.658617	21	missense	exonic	Gain-of-Function	Hotspot	drug_response
27-002	TP53	c.566C>T	p.A189V	NM_000546.6	snp	chr17	7578283	0.421053	6	missense	exonic			Conflicting_interpretations_of_pathogenicity
27-002	PDGFRA	c.932-3G>T	p.?	NM_006206.6	snp	chr4	55133716	0.478469	7	unknown	splicesite_3
29-001	EGFR	c.2240_2254delTAAGAGAAGCAACAT	p.L747_T751del	NM_005228.5	del	chr7	55242462	5.55133	19	nonframeshiftDeletion	exonic	Gain-of-Function	EGFRExon19Deletion	drug_response
29-001	EGFR	c.2369C>T	p.T790M	NM_005228.5	snp	chr7	55249070	4.76744	20	missense	exonic	Gain-of-Function	Hotspot	drug_response
33-001	EGFR	c.2308G>A	p.D770N	NM_005228.5	snp	chr7	55249010	0.416667	20	missense	exonic
33-001	KRAS	c.44G>T	p.G15V	NM_033360.4	snp	chr12	25398275	0.568182	2	missense	exonic
34-001	APC	c.4232G>A	p.S1411N	NM_000038.6	snp	chr5	112175523	0.148368	16	missense	exonic
34-001	ALK	c.3538G>A	p.V1180I	NM_004304.5	snp	chr2	29443679	0.205444	23	missense	exonic
34-001	ESR1	c.1387T>C	p.S463P	NM_001122740.2	snp	chr6	152415537	0.135014	8	missense	exonic
34-001	GNAQ	c.626A>G	p.Q209R	NM_002072.5	snp	chr9	80409488	0.109709	5	missense	exonic
35-001	EGFR	c.1393G>A	p.G465R	NM_005228.4	snp	chr7	55227926	0.49505	12	missense	exonic
35-001	EGFR	c.2369C>T	p.T790M	NM_005228.4	snp	chr7	55249071	0.902935	20	missense	exonic
35-001	EGFR	c.2235_2249delGGAATTAAGAGAAGC	p.E746_A750del	NM_005228.4	del	chr7	55242462	2.77778	19	nonframeshiftDeletion	exonic	Gain-of-Function	Hotspot
35-001	IDH1	c.394C>T	p.R132C	NM_005896.3	snp	chr2	209113113	0.618557	4	missense	exonic
35-002	FGFR3	c.1138G>A	p.G380R	NM_000142.5	snp	chr4	1806118	0.230415	9	missense	exonic
35-002	MET	c.3743A>G	p.Y1248C	NM_001127500.3	snp	chr7	116423414	0.115207	19	missense	exonic
35-002	SF3B1	c.2098A>G	p.K700E	NM_012433.4	snp	chr2	198266834	0.106326	15	missense	exonic
35-004	APC	c.4099C>A	p.Q1367K	NM_000038.5	snp	chr5	112175390	0.653595	16	missense	exonic
35-004	EGFR	c.2235_2249delGGAATTAAGAGAAGC	p.E746_A750del	NM_005228.4	del	chr7	55242462	7.45763	19	nonframeshiftDeletion	exonic	Gain-of-Function	Hotspot
35-004	TP53	c.721delT	p.S241Pfs*6	NM_000546.5	del	chr17	7577559	2.98211	7	frameshiftDeletion	exonic
35-004	PDGFRA	c.1676G>T	p.W559L	NM_006206.5	snp	chr4	55141028	1.36054	12	missense	exonic
36-003	EGFR	c.2506C>T	p.R386C	NM_005228.4	snp	chr7	55259446	0.157233	21	missense	exonic
36-003	PIK3CA	c.2179dupA	p.T727Nfs	NM_006218.3	ins	chr3	178938934	0.331248	14	frameshiftInsertion	exonic
36-005	EGFR	c.2573T>G	p.L858R	NM_005228.4	snp	chr7	55259515	25.6277	21	missense	exonic	Gain-of-Function	Hotspot	drug_response
36-005	KRAS	c.183A>C	p.Q61H	NM_033360.3	snp	chr12	25380275	3.67435	3	missense	exonic	Gain-of-Function	Hotspot	Pathogenic/Likely_pathogenic
36-005	KRAS	c.35G>A	p.G12D	NM_033360.3	snp	chr12	25398283	0.639829	2	missense	exonic	Gain-of-Function	Hotspot
36-005	NRAS	c.181C>A	p.Q61K	NM_002524.4	snp	chr1	115256530	1.80485	3	missense	exonic	Gain-of-Function	Hotspot	Pathogenic/Likely_pathogenic
36-005	TP53	c.247G>A	p.A83T	NM_000546.5	snp	chr17	7579440	0.244978	4	missense	exonic
36-005	TP53	c.402T>G	p.F134L	NM_000546.5	snp	chr17	7578526	11.2873	5	missense	exonic
36-005	TP53	c.45delT	p.Q16fs	NM_000546.5	del	chr17	7579867	0.221239	2	frameshiftDeletion	exonic	Loss-of-Function	Deleterious
36-007	EGFR	c.2369C>T	p.T790M	NM_005228.4	snp	chr7	55249071	2.26969	20	missense	exonic	Gain-of-Function	Hotspot	drug_response
36-007	EGFR	c.2573T>G	p.L858R	NM_005228.4	snp	chr7	55259515	5.14869	21	missense	exonic	Gain-of-Function	Hotspot	drug_response
38-002	EGFR	c.2303G>T	p.S768I	NM_005228.4	snp	chr7	55249005	21.0699	20	missense	exonic	Gain-of-Function	Hotspot	Pathogenic/Likely_pathogenic
38-002	EGFR	c.2369C>T	p.T790M	NM_005228.4	snp	chr7	55249071	5.05007	20	missense	exonic	Gain-of-Function	Hotspot	drug_response
38-002	EGFR	c.2573T>G	p.L858R	NM_005228.4	snp	chr7	55259515	16.3367	21	missense	exonic	Gain-of-Function	Hotspot	drug_response
38-002	TP53	c.438G>A	p.W146*	NM_000546.5	snp	chr17	7578492	1.22646	5	nonsense	exonic	Loss-of-Function	Deleterious	Pathogenic
38-003	PDGFRA	c.932-1G>C	p.?	NM_006206.5	snp	chr4	55133716	1.49701	7	unknown	splicesite_3
38-003	TP53	c.262G>C	p.A88P	NM_000546.5	snp	chr17	7579425	1.44092	4	missense	exonic
38-004	TP53	c.818G>T	p.R273L	NM_000546.5	snp	chr17	7577120	0.311042	8	missense	exonic
38-009	EGFR	c.2236_2250delGAATTAAGAGAAGCA	p.E746_A750del	NM_005228.4	del	chr7	55242462	0.320513	19	nonframeshiftDeletion	exonic	Gain-of-Function	Hotspot
38-009	FBXW7	c.1393C>T	p.R465C	NM_033632.3	snp	chr4	153249385	0.228311	9	missense	exonic
38-009	TP53	c.711G>C	p.M237I	NM_000546.5	snp	chr17	7577570	0.293255	7	missense	exonic
38-009	TP53	c.587G>A	p.R196Q	NM_000546.5	snp	chr17	7578262	0.251256	6	missense	exonic			Uncertain_significance
38-011	TP53	c.569C>A	p.P190H	NM_000546.5	snp	chr17	7578274	0.178412	6	missense	exonic
39-004	EGFR	c.2240_2257delTAAGAGAAGCAACATCTC	p.L747_P753delinsS	NM_005228.5	del	chr7	55242462	1.39935	19	nonframeshiftDeletion	exonic	Gain-of-Function	EGFRExon19Deletion	drug_response
39-004	EGFR	c.2369C>T	p.T790M	NM_005228.5	snp	chr7	55249071	0.330033	20	missense	exonic	Gain-of-Function	Hotspot	drug_response
39-005	EGFR	c.2573T>G	p.L858R	NM_005228.4	snp	chr7	55259515	0.24055	21	missense	exonic	Gain-of-Function	Hotspot	drug_response
39-005	ESR1	c.1174G>A	p.V392I	NM_001122740.1	snp	chr6	152332868	0.231214	6	missense	exonic
39-007	RET	c.1852T>C	p.C618R	NM_020975.6	snp	chr10	43609096	0.496894	10	missense	exonic
A3	PIK3CA	c.277C>T	p.R93W	NM_006218.4	snp	chr3	178916890	0.167616	2	missense	exonic
A3	TP53	c.280T>C	p.S94P	NM_000546.6	snp	chr17	7579407	0.223914	4	missense	exonic
A3	TP53	c.311_312delAGinsCA	p.Q104P	NM_000546.6	mnp	chr17	7579375	0.960659	4	missense	exonic
A3	TP53	c.742C>T	p.R248W	NM_000546.6	snp	chr17	7577539	1.16744	7	missense	exonic	Loss-of-Function	Hotspot	Pathogenic
A5	EGFR	c.2573T>G	p.L858R	NM_005228.5	snp	chr7	55259515	3.30058	21	missense	exonic	Gain-of-Function	Hotspot	drug_response
A5	EGFR	c.2497T>G	p.L833V	NM_005228.5	snp	chr7	55259439	3.30058	21	missense	exonic	Gain-of-Function	Hotspot	Uncertain_significance
A6	MAP2K1	c.383delG	p.G128Afs	NM_002755.4	del	chr15	66729172	0.474608	3	frameshiftDeletion	exonic
A6	TP53	c.473G>A	p.R158H	NM_000546.6	snp	chr17	7578457	0.123001	5	missense	exonic
A6	TP53	c.300delG	p.T102PfsTer21	NM_000546.6	del	chr17	7579382	0.224972	4	frameshiftDeletion	exonic
